# Supplementary material
Source: PubMed Central journal article supplement (PMC10529502)

# Figure 1B (left)

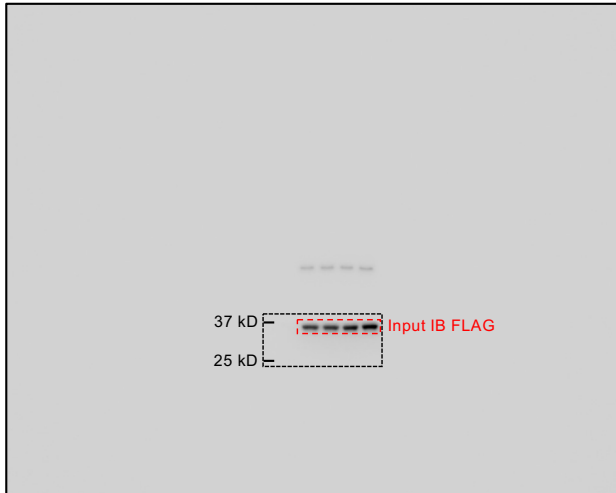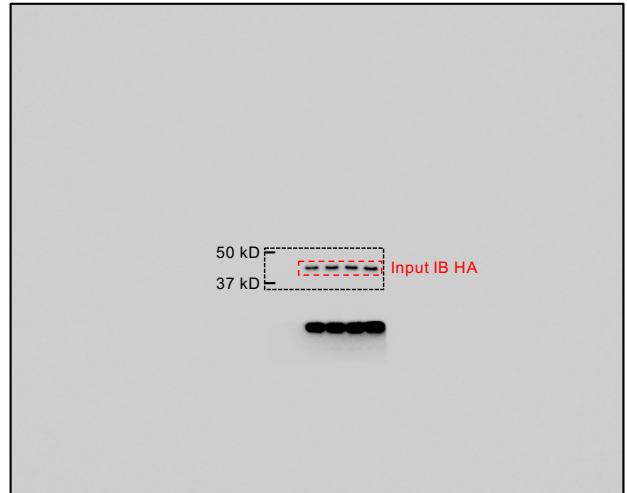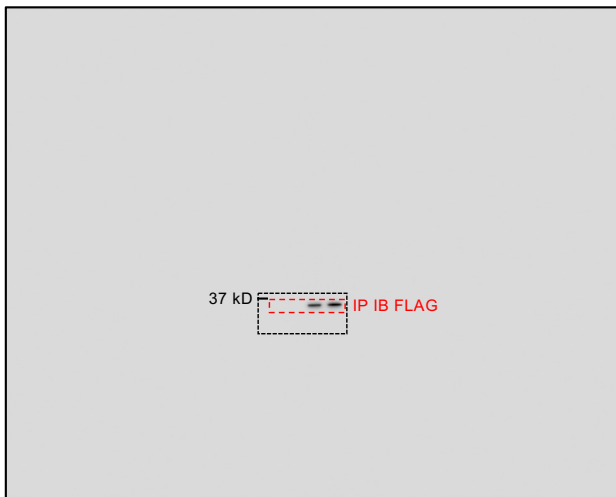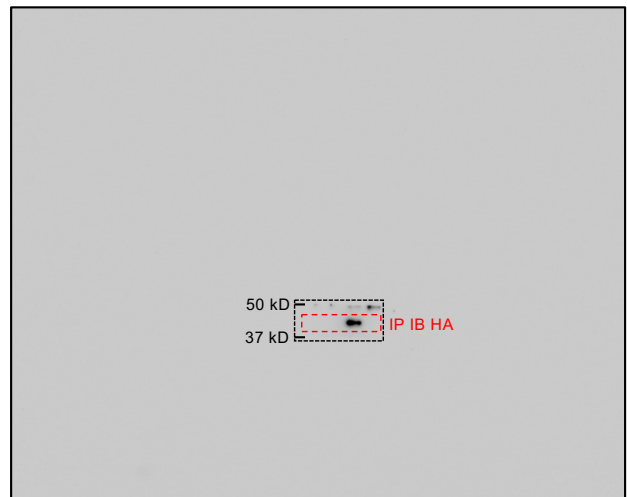

# Figure 1B (right)

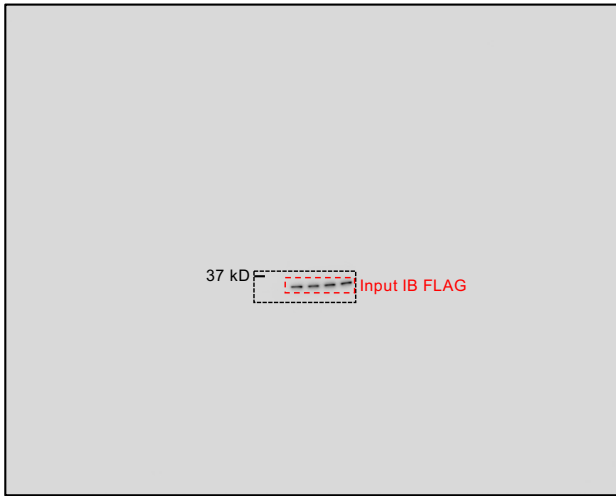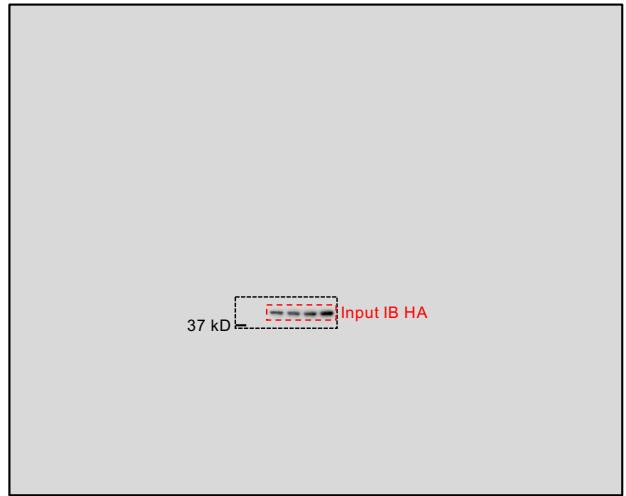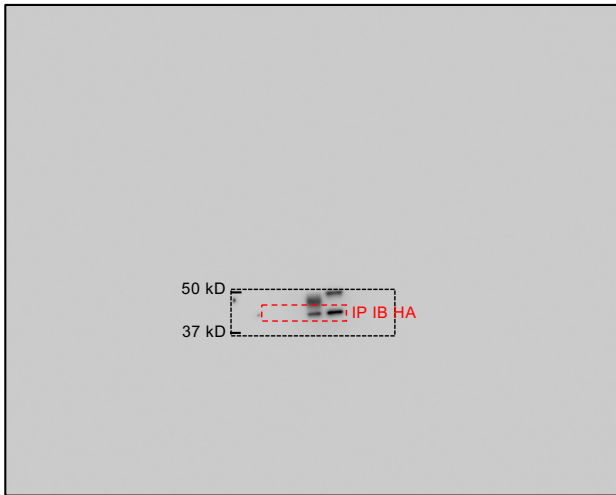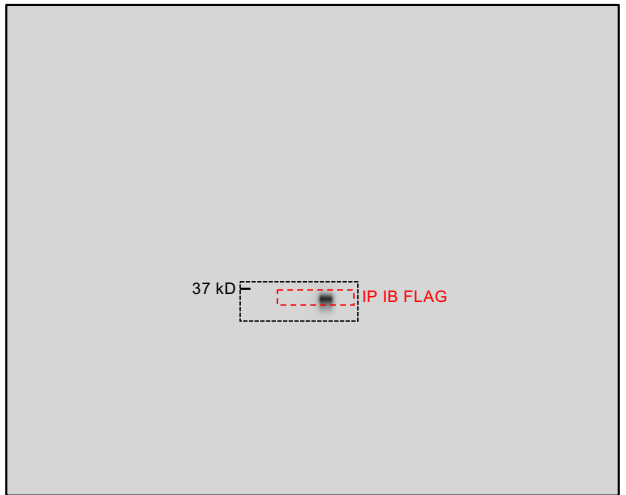

# Figure 2C

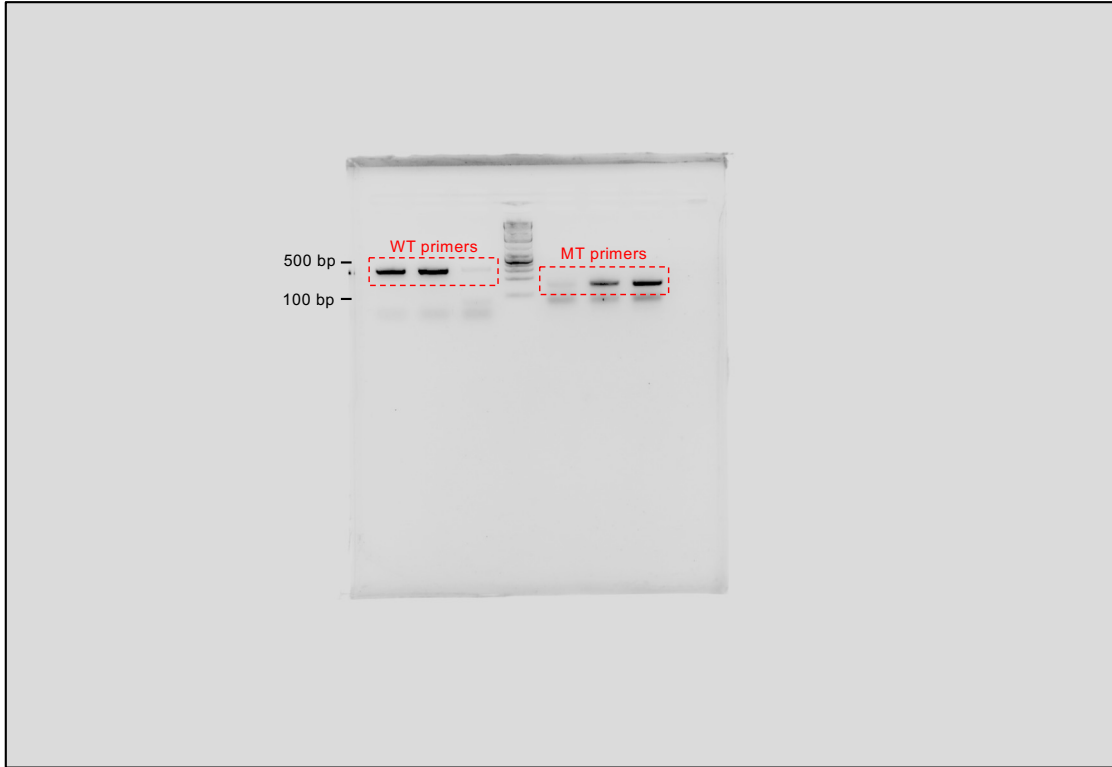

# Figure 2D

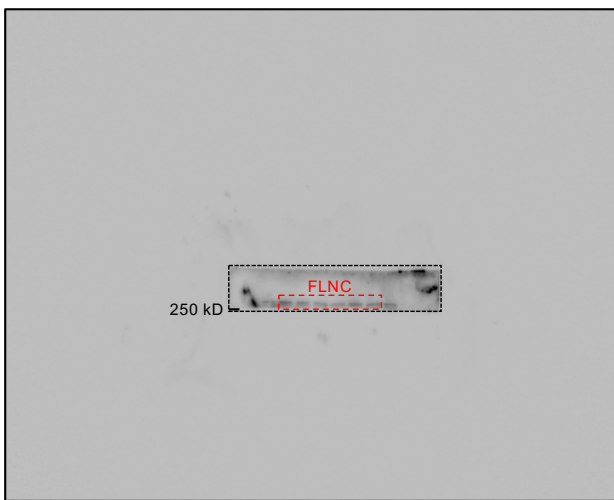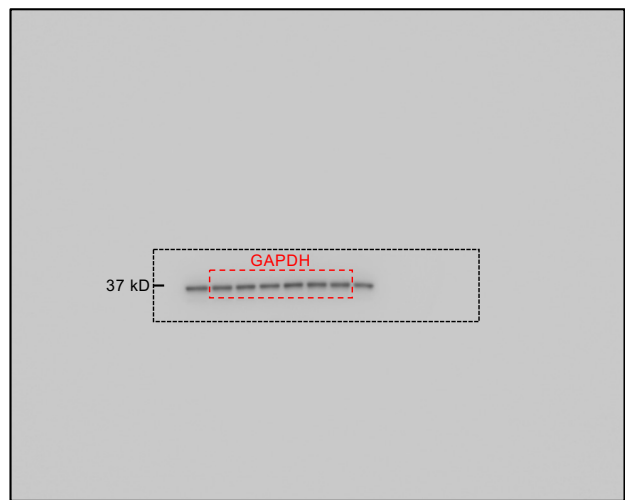

# Figure 6A (1)

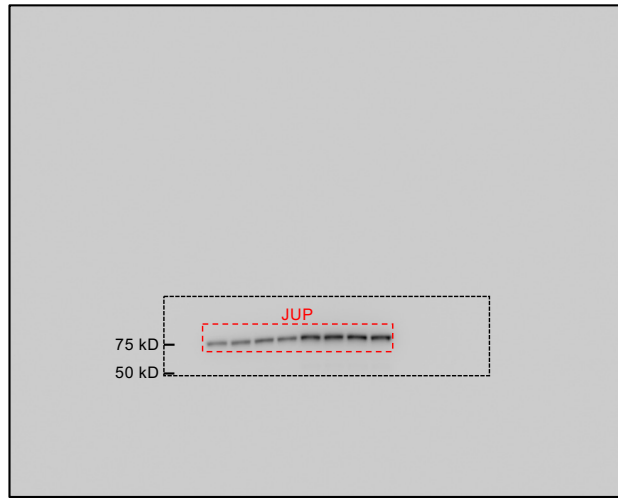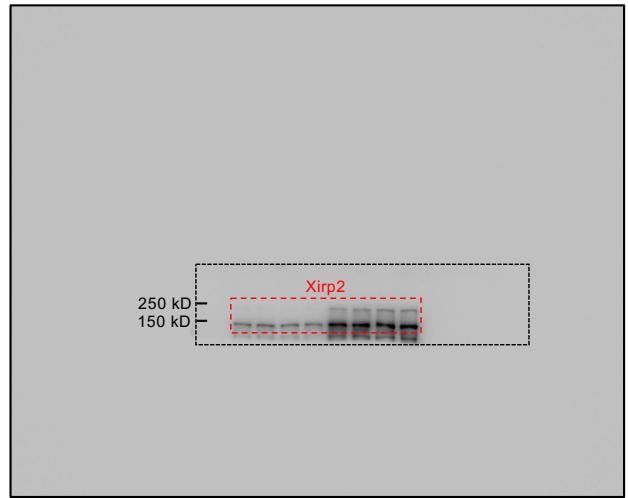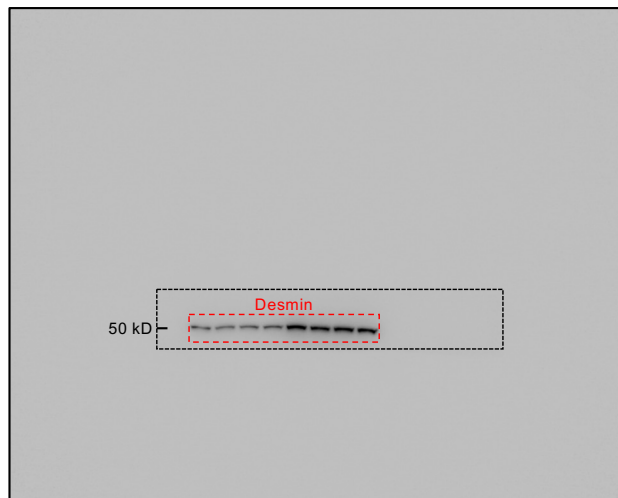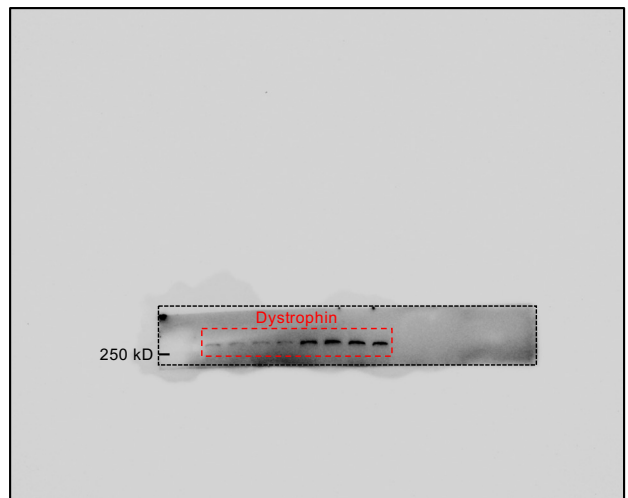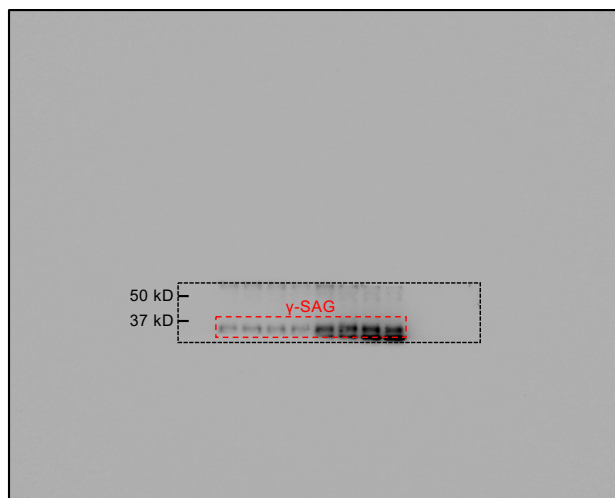

# Figure 6A (2)

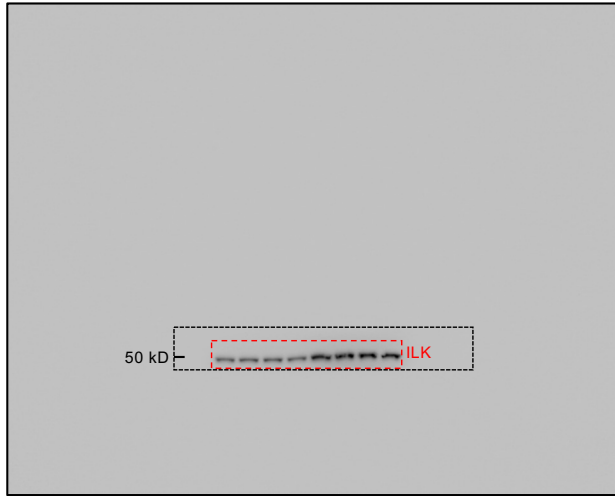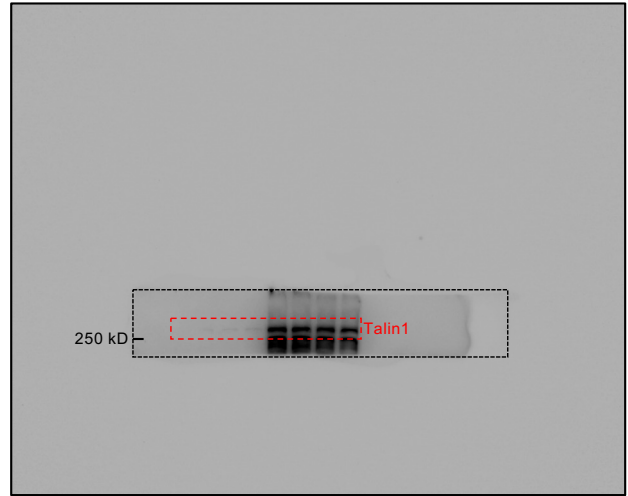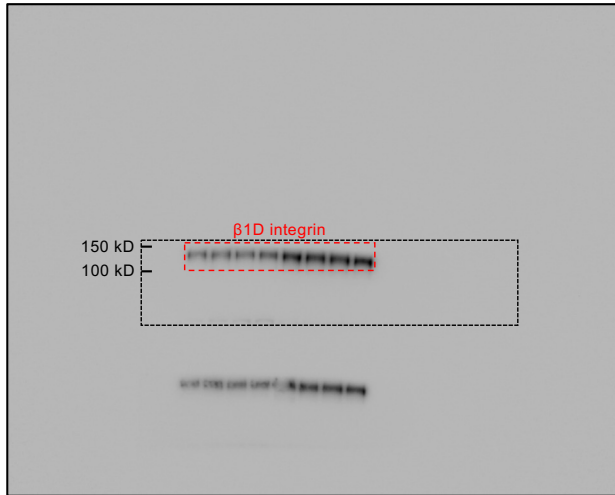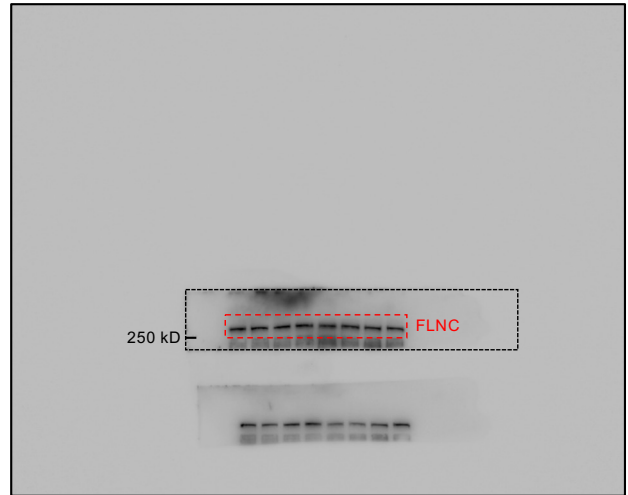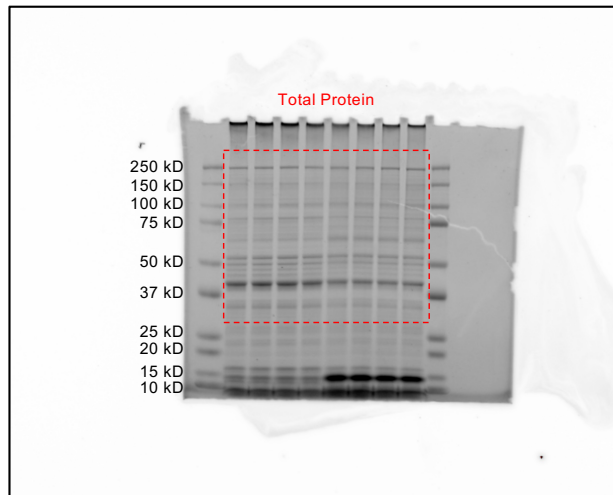

# Supplemental Figure 3A (left)

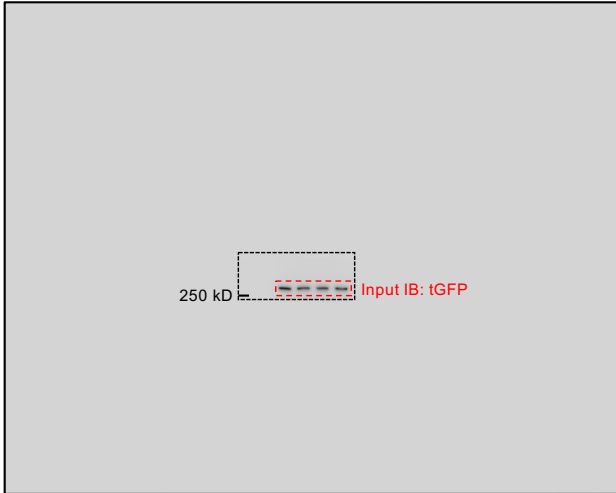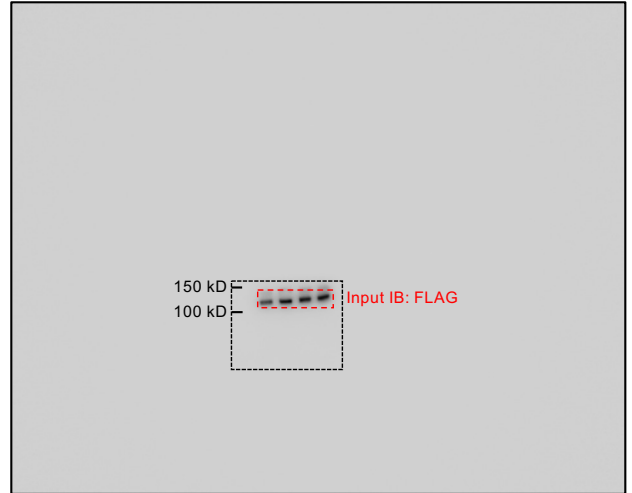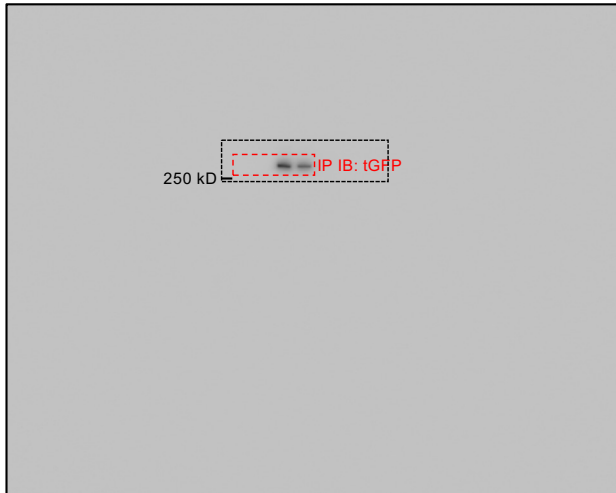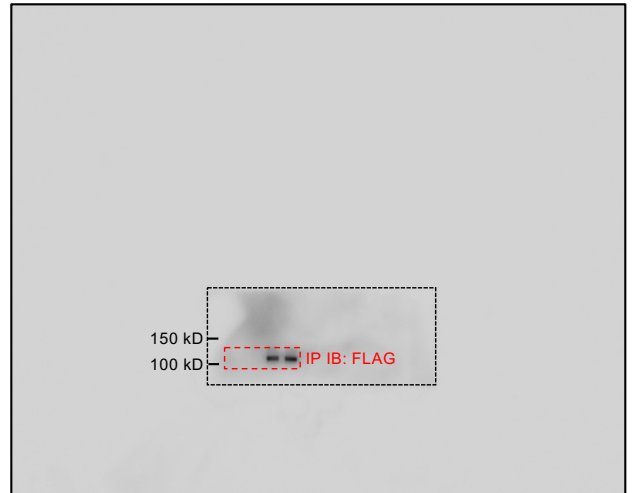

# Supplemental Figure 3A (right)

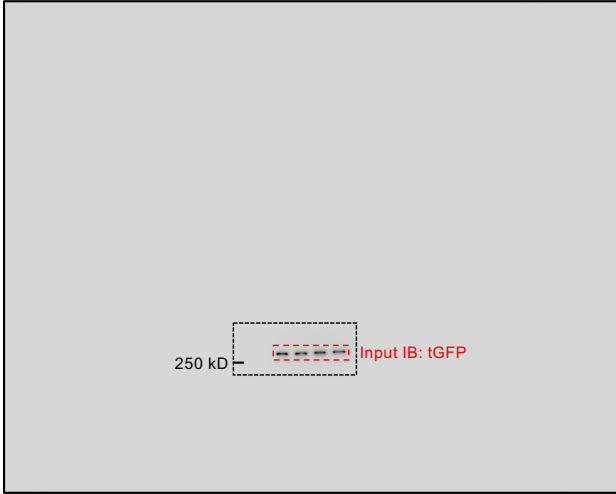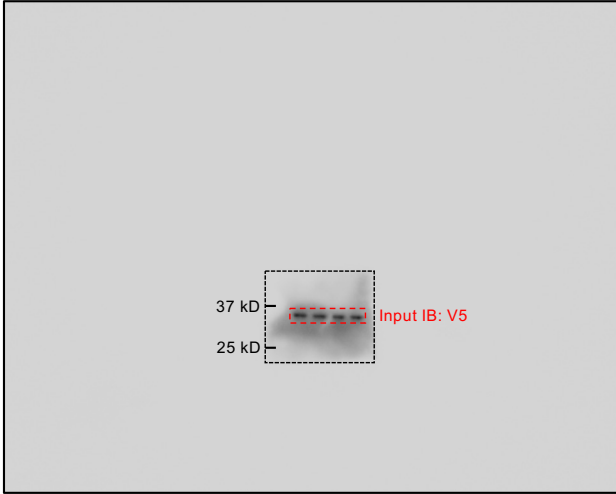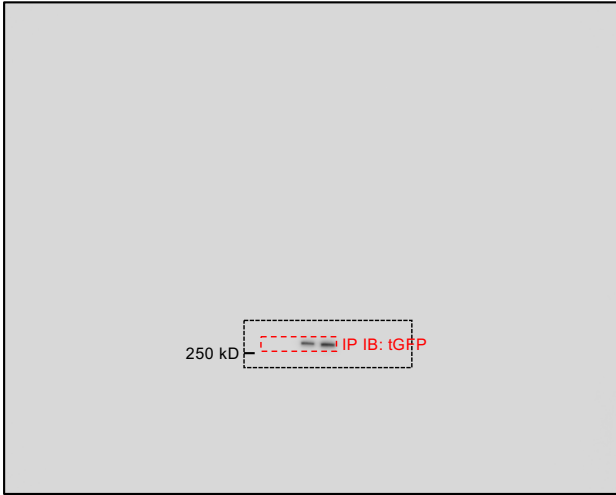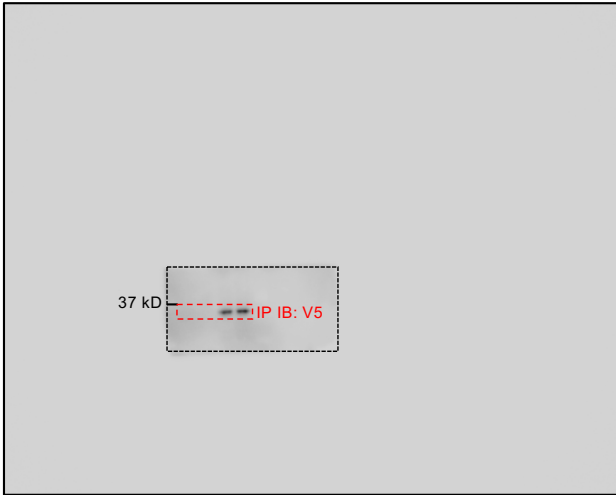

Supplement: NIHMS1918602-supplement-322750_Uncut_Gel_Blots.pdf [file NIHMS1918602-supplement-322750_Uncut_Gel_Blots.pdf]
