# Supplementary material
Source: PubMed Central journal article supplement (PMC10529502)
Supplement: NIHMS1918602-supplement-322750_Data_Supplement.pdf [file NIHMS1918602-supplement-322750_Data_Supplement.pdf]

## **Online Supplemental Materials**

### **Interaction of filamin C with actin is essential for cardiac development and function**

Xiaohai Zhou, Xi Fang, Sujay S. Ithychanda, Tongbin Wu, Yusu Gu, Chao Chen, Li Wang,  
Julius Bogomolovas, Jun Qin and Ju Chen

1) Supplemental Figures 1-7 and Figure Legends;

2) Supplemental Tables1-2

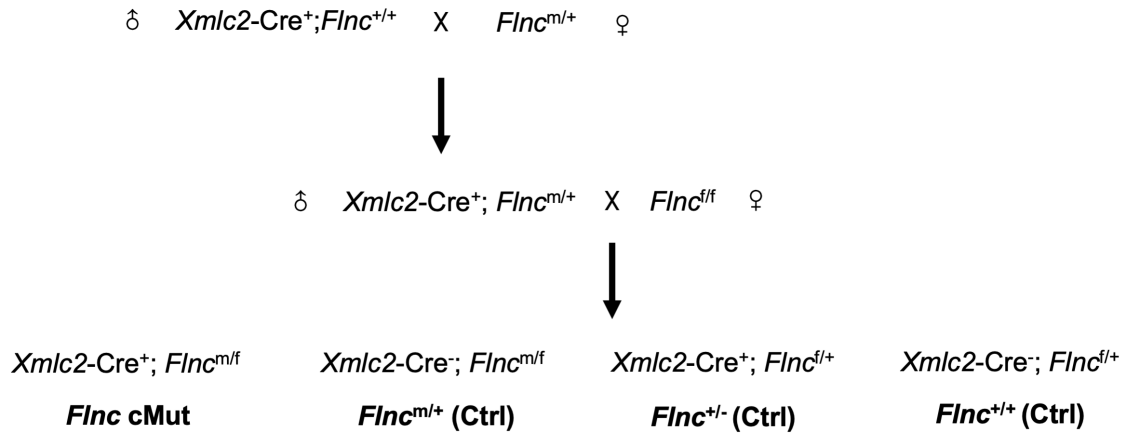

**Supplemental Fig. 1 Breeding scheme for generating *Xmlc2-Cre<sup>+</sup>;Flnct<sup>mutant/flox</sup> (cMut)* and the corresponding control (Ctrl) mice. m: FLNC F93A/L98E mutant allele; f: *Flnct* floxed allele.**

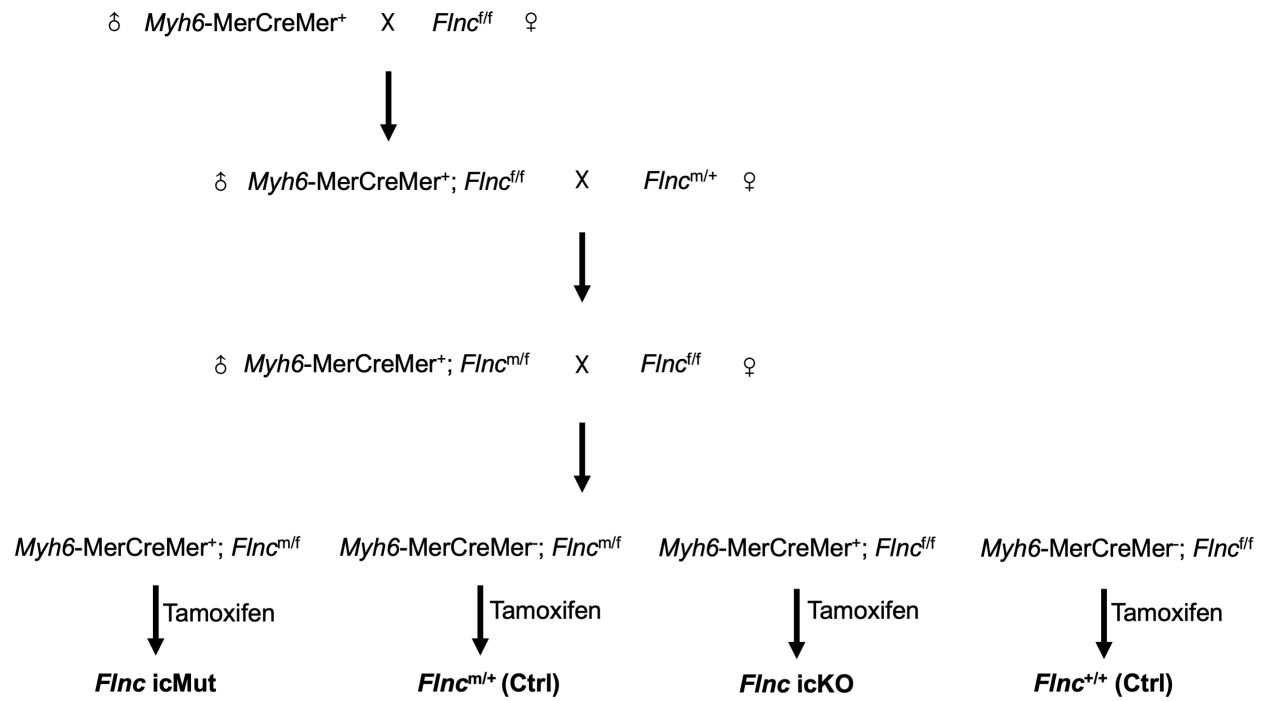

**Supplemental Fig. 2 Breeding scheme for generating *Myh6-MerCreMer*<sup>+</sup>; *FlnC*<sup>mutant/flox</sup>**

**(icMut) and the corresponding control (Ctrl) mice.** m: FLNC F93A/L98E mutant allele; f: *FlnC* floxed allele.

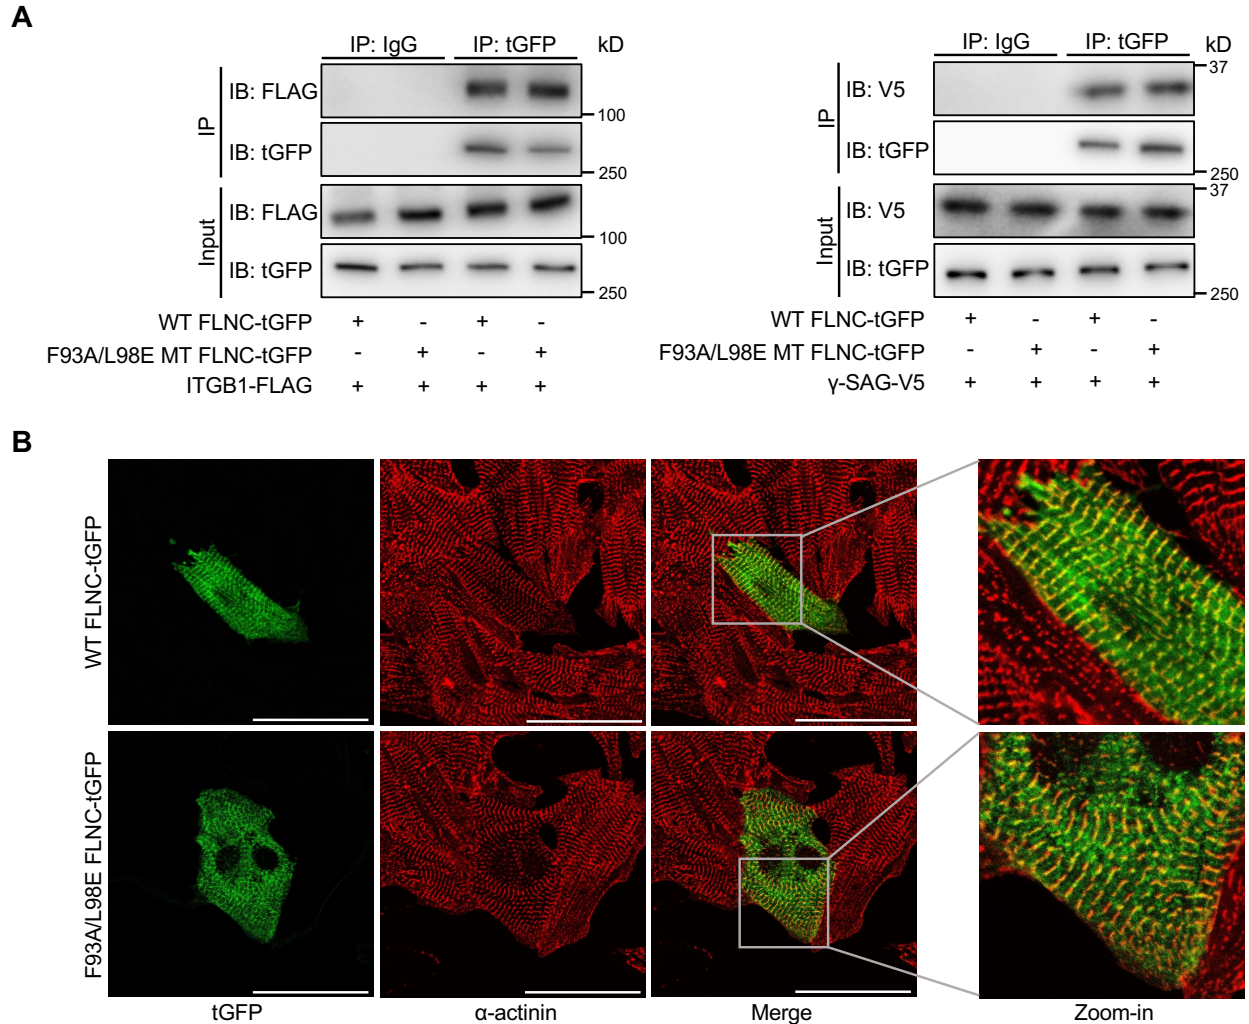

**Supplemental Fig. 3 Loss of actin binding activity in FLNC does not affect its interaction with other binding partners or its subcellular localization.** (A) Co-immunoprecipitation (Co-IP) of TurboGFP (tGFP) tagged wild type (WT) or F93A/L98E mutant filamin C (FLNC) with FLAG tagged  $\beta$ 1 integrin (ITGB1) and V5 tagged  $\gamma$ -sarcoglycan ( $\gamma$ -SAG). The vectors containing cDNA sequences encoding all fusion proteins were co-transfected into HEK 293 cells for overexpression.  $n = 3$  independently repeated experiments. (B) Representative immunofluorescence of tGFP and  $\alpha$ -actinin on neonatal cardiomyocytes expressing tGFP tagged WT or F93A/L98E mutant FLNC.  $n \geq 20$  cells/group. Scale bar: 50  $\mu$ m.

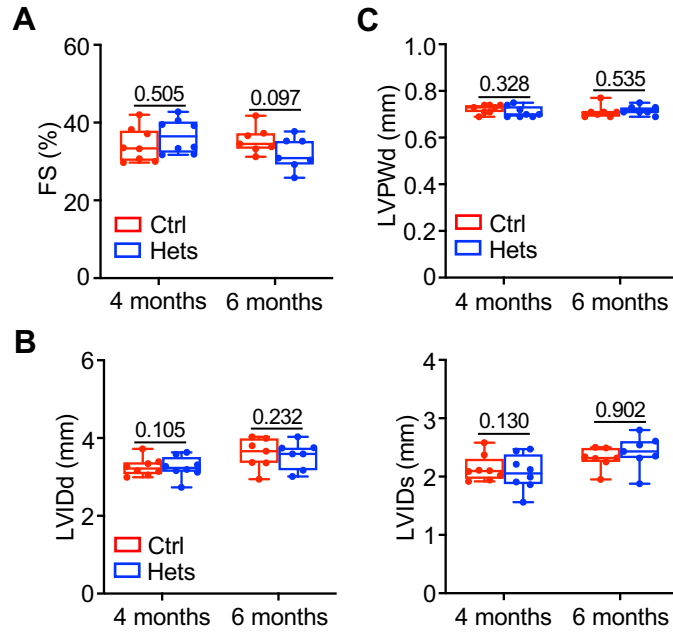

**Supplemental Fig. 4 No cardiac defects in heterozygous FLNC F93/L98E mutant mice.**

Measurements of cardiac function index FS (A) , as well as the left ventricular dilatation indexes LVIDd, LVIDs (B) and LVPWD (C) from echocardiographic assays on heterozygous FLNC F93/L98E mutant (Hets) and wild-type control (Ctrl) and control mice at 4 months (n = 8 animals/group) and 6 months (n = 7 animals/group) of age. FS: fractional shortening; LVIDd: left ventricular internal diameter, end diastole; LVIDs: left ventricular internal diameter, end systole; LVPWD: left ventricle posterior wall thickness, end diastolic. All quantitative data shown in this figure are presented as mean values  $\pm$  SD. Mann–Whitney U test was used to calculate the presented p-values.

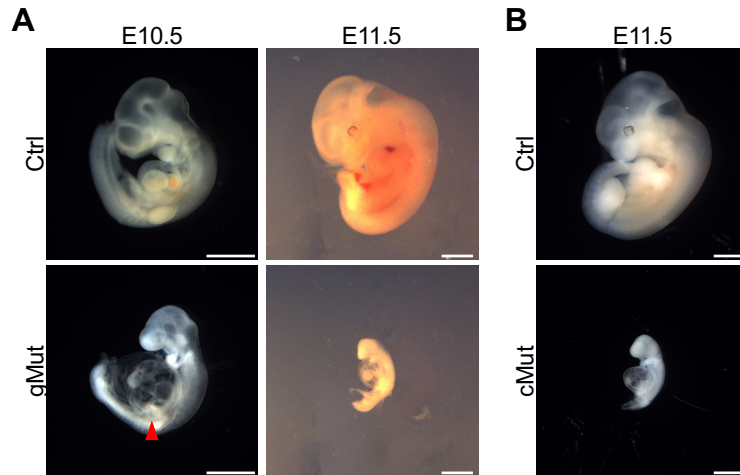

**Supplemental Fig. 5 Disruption of FLNC-actin binding leads to cardiac developmental defects and embryonic lethality.** (A) Representative images of whole embryos of wild-type control (Ctrl) and global FLNC F93/L98E mutant (gMut) mice at E10.5 and E11.5.  $n \geq 5$  biologically independent samples/group. The red arrowheads indicate the pericardial effusion. (B) Representative images of whole embryos of *Xmlc2-Cre<sup>+</sup>;Flnc<sup>mutant/flox</sup>* (cMut) and control (Ctrl) mice at E11.5.  $n \geq 5$  biological independent samples/group. Scale bar: 1 mm.

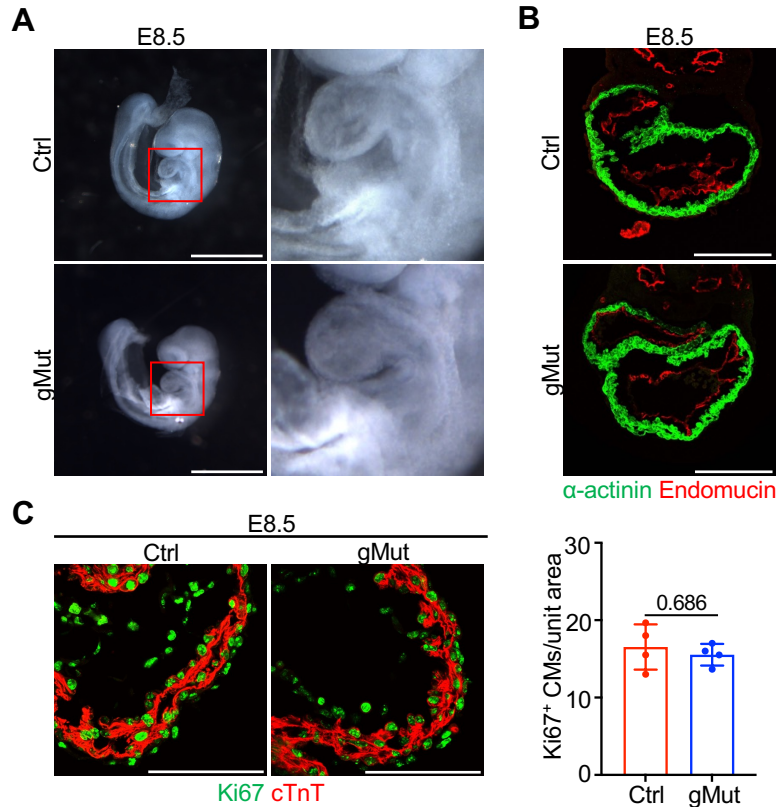

**Supplemental Fig. 6 No cardiac developmental defects in FLNC F93/L98E mutant mice at E8.5. (A)** Representative images of whole embryos and hearts from wild-type control (Ctrl) and global FLNC F93/L98E mutant (gMut) mice at E8.5.  $n \geq 5$  biologically independent samples/group. scale bar: 1 mm. **(B)** Representative immunofluorescence of  $\alpha$ -actinin and Endomucin on wild-type control (Ctrl) and gMut heart sections at E8.5.  $n = 4$  biologically independent samples/group. Scale bar: 100  $\mu$ m. **(C)** Representative immunofluorescence and corresponding quantitative analysis of Ki67 and cardiac troponin T (cTnT) on heart sections from wild-type control (Ctrl) and gMut embryos at E8.5.  $n = 4$  biologically independent samples/group. Scale bar: 100  $\mu$ m. All quantitative data shown in this figure are presented as mean values  $\pm$  SD. Mann–Whitney U test was used to calculate the presented p-values in **C**.

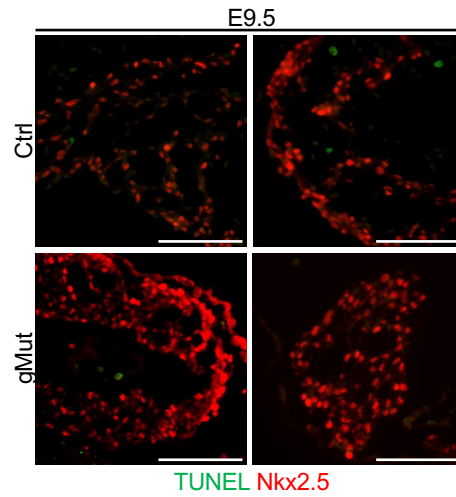

**Supplemental Fig. 7 Loss of FLNC-actin binding has no effect on the level of cardiac cell death:** Representative TUNEL staining of wild-type control (Ctrl) and global FLNC F93/L98E mutant (gMut) hearts at E9.5. Immunostaining of cTnT was used to co-stain cardiomyocyte nuclei. n = 3 biologically independent samples/group. Scale bar: 100  $\mu$ m.



**Supplemental Table 1. Primer sequences for genotyping and qRT-PCR**

| <b>Primers for genotyping</b> |                         |                               |
|-------------------------------|-------------------------|-------------------------------|
|                               | <b>Forward</b>          | <b>Reverse</b>                |
| <i>Fln</i> wild type allele   | GCCACCATGATGAACAACAG    | TCCAGCTTCATTTGgCGGAA          |
| <i>Fln</i> mutant allele      | GCCCGCCAAATGAAGGAG      | CTCAGTACCCGCACCTATGT          |
| <i>Fln</i> sequencing         | GGAAGAAGATCCAGCAGAACAC  | TAGGGAGGCTGAAGCTAAGATG        |
| <i>Fln</i> floxed allele      | GAATGGAGGTTGTAGGATCCCAG | TATATGTTAGTAGTCAGGGAGAGG<br>C |
| <i>Xml2-Cre</i>               | AGCCATCTTTGGTTCTCTGC    | TCCCTGAACATGTCCATCAG          |
| <i>Myh6-MerCreMer</i>         | GCCATAGGCTACGGTGTAAG    | GTTGGTCAATAAGCCCATCATT        |

| <b>Primers for qRT-PCR</b> |                           |                            |
|----------------------------|---------------------------|----------------------------|
| <b>mRN A</b>               | <b>Forward</b>            | <b>Reverse</b>             |
| <i>Anf</i>                 | GATAGATGAAGGCAGGAAGCCGC   | AGGATTGGAGCCCAGAGTGGACTAGG |
| <i>Bnp</i>                 | TGTTTCTGCTTTTCCTTTATCTGTC | CTCCGACTTTTCTTTATCAGCTC    |
| <i>Myh6</i>                | GCTGGAAGATGAGTGCTCAGAG    | CCAGCCATCTCCTCTGTTAGGT     |
| <i>Myh7</i>                | GCTGGAAGATGAGTGCTCAGAG    | TCCAAACCAGCCATCTCCTCTG     |
| <i>Col1a 1</i>             | ACTGCAACATGGAGACAGGTCAGA  | ATCGGTCATGCTCTCTCCAAACCA   |
| <i>Col3a 1</i>             | ACGTAGATGAATTGGGATGCAG    | GGGTTGGGGCAGTCTAGTG        |
| <i>Polr2 a</i>             | CGAGAAGGTCTCATTGACACGG    | ACCACCTGGTTGATGGAGTTCC     |

**Supplemental Table 2. Antibody list**

| <b>Antibodies for immunofluorescence</b>                             |                        |                |
|----------------------------------------------------------------------|------------------------|----------------|
| <b>Antigen</b>                                                       | <b>Producer</b>        | <b>Cat. No</b> |
| TurboGFP                                                             | OriGene                | MG222854       |
| $\alpha$ -actinin                                                    | Abcam                  | ab68167        |
| Ki67                                                                 | Abcam                  | Ab15580        |
| Cardiac troponin T                                                   | Thermo Fisher          | MS-295-P1      |
| Endomucin                                                            | Thermo Fisher          | 14-5851-82     |
| Collagen I                                                           | Abcam                  | ab34710        |
| 9EG7                                                                 | BD Biosciences         | 553715         |
| Nkx2.5                                                               | R&D Systems            | AF2444         |
| Normal Rabbit IgG                                                    | Cell Signaling         | 2729           |
| Normal Mouse IgG                                                     | Santa Cruz             | sc-2025        |
| Alexa Fluor <sup>®</sup> 488 AffiniPure Donkey Anti-Rabbit IgG (H+L) | Jackson ImmunoResearch | 711-545-152    |
| Alexa Fluor <sup>®</sup> 594 AffiniPure Donkey Anti-Mouse IgG (H+L)  | Jackson ImmunoResearch | 715-585-150    |
| Alexa Fluor <sup>®</sup> 488 AffiniPure Donkey Anti-Mouse IgG (H+L)  | Jackson ImmunoResearch | 715-545-150    |
| Alexa Fluor <sup>®</sup> 594 AffiniPure Donkey Anti-Rabbit IgG (H+L) | Jackson ImmunoResearch | 711-585-152    |

| <b>Antibodies for western blot and immunoprecipitation</b> |                 |                |
|------------------------------------------------------------|-----------------|----------------|
| <b>Antigen</b>                                             | <b>Producer</b> | <b>Cat. No</b> |
| FLAG tag                                                   | Sigma-Aldrich   | F7425          |
| HA tag                                                     | Santa Cruz      | sc-7392        |
| TurboGFP                                                   | OriGene         | MG222854       |

|                                                |                     |            |
|------------------------------------------------|---------------------|------------|
| V5                                             | Abcam               | ab-27671   |
| FLNC                                           | Novus Biologicals   | NBP1-89300 |
| GAPDH                                          | Santa Cruz          | sc-32233   |
| $\beta$ 1D integrin                            | Thermo Fisher       | MA1-06906  |
| Talin1                                         | Bio-Rad             | MCA4770    |
| ILK                                            | Cell Signaling      | 3862       |
| $\gamma$ -SAG                                  | Vector Laboratories | VP-G803    |
| Dystrophin                                     | Abcam               | ab-15277   |
| Desmin                                         | Santa Cruz          | sc-7559    |
| Xirp2                                          | Proteintech         | 11896-1-AP |
| JUP                                            | Sigma-Aldrich       | P8087      |
| Normal Rabbit IgG                              | Cell Signaling      | 2729       |
| Normal Mouse IgG                               | Santa Cruz          | sc-2025    |
| Polyclonal Goat Anti-Rabbit Immunoglobulin/HRP | Dako                | P0448      |
| Polyclonal Goat Anti-Mouse Immunoglobulin/HRP  | Dako                | P0447      |
