# Supplementary material
Source: PubMed Central journal article supplement (PMC10529502)
Supplement: NIHMS1918602-supplement-322750_Major_Resources_Table.pdf [file NIHMS1918602-supplement-322750_Major_Resources_Table.pdf]

## Major Resources Table

In order to allow validation and replication of experiments, all essential research materials listed in the Methods should be included in the Major Resources Table below. Authors are encouraged to use public repositories for protocols, data, code, and other materials and provide persistent identifiers and/or links to repositories when available. Authors may add or delete rows as needed.

### Animals (in vivo studies)

| Species                       | Vendor or Source | Background Strain | Sex         | Persistent ID / URL                                                                                                                                                     |
|-------------------------------|------------------|-------------------|-------------|-------------------------------------------------------------------------------------------------------------------------------------------------------------------------|
| Mouse ( <i>Mus musculus</i> ) | Charles River    | C57BL/6NCrI       | Female/Male | <a href="https://www.criver.com/products-services/find-model/c57bl6-mouse?region=3611">https://www.criver.com/products-services/find-model/c57bl6-mouse?region=3611</a> |

### Genetically Modified Animals

| Species                     | Vendor or Source                        | Background Strain | Persistent ID / URL  |
|-----------------------------|-----------------------------------------|-------------------|----------------------|
| FLNC F93A/L98E mice         | Home-made                               | C57BL/6NCrI       |                      |
| <i>Fln</i> c floxed mice    | International Knockout Mouse Consortium | C57BL/6J          | MGI: 4847813         |
| <i>Xmlc2</i> -Cre mice      | International Knockout Mouse Consortium | MF1               | MGI: 3712342         |
| <i>Myh6</i> -MerCreMer mice | The Jackson Laboratory                  | C57BL/6J          | RRID:IMSR_JAX:005657 |

### Antibodies

| Target antigen                   | Vendor or Source | Catalog #  | Working concentration         | Persistent ID / URL                                                                                                                                                                                                                                                                                                                         |
|----------------------------------|------------------|------------|-------------------------------|---------------------------------------------------------------------------------------------------------------------------------------------------------------------------------------------------------------------------------------------------------------------------------------------------------------------------------------------|
| TurboGFP                         | Origene          | MG222854   | 1:500 for IF<br>1:200 for IP  | <a href="https://www.origene.com/catalog/antibodies/tag-antibodies/ta150041/mouse-monoclonal-turbogfp-antibody-clone-oti2h8">https://www.origene.com/catalog/antibodies/tag-antibodies/ta150041/mouse-monoclonal-turbogfp-antibody-clone-oti2h8</a>                                                                                         |
| $\alpha$ -actinin                | Abcam            | ab68167    | 1:500 for IF                  | <a href="https://www.abcam.com/products/primary-antibodies/sarcomeric-alpha-actinin-antibody-ep2529y-ab68167.html">https://www.abcam.com/products/primary-antibodies/sarcomeric-alpha-actinin-antibody-ep2529y-ab68167.html</a>                                                                                                             |
| Ki67                             | Abcam            | ab15580    | 1:500 for IF                  | <a href="https://www.abcam.com/products/primary-antibodies/ki67-antibody-ab15580.html">https://www.abcam.com/products/primary-antibodies/ki67-antibody-ab15580.html</a>                                                                                                                                                                     |
| Cardiac troponin T               | Thermo Fisher    | MS-295-P1  | 1:500 for IF                  | <a href="https://efaidnbmnnnibpcajpcglclefindmkaj/https://tools.thermofisher.com/content/sfs/brochures/D11737~.pdf">https://efaidnbmnnnibpcajpcglclefindmkaj/https://tools.thermofisher.com/content/sfs/brochures/D11737~.pdf</a>                                                                                                           |
| Endomucin                        | Thermo Fisher    | 14-5851-82 | 1:100 for IF                  | <a href="https://www.thermofisher.com/antibody/product/Endomucin-Antibody-clone-eBioV-7C7-V-7C7-Monoclonal/14-5851-82">https://www.thermofisher.com/antibody/product/Endomucin-Antibody-clone-eBioV-7C7-V-7C7-Monoclonal/14-5851-82</a>                                                                                                     |
| Collagen I                       | Abcam            | ab34710    | 1:500 for IF                  | <a href="https://www.abcam.com/products/primary-antibodies/collagen-i-antibody-ab34710.html">https://www.abcam.com/products/primary-antibodies/collagen-i-antibody-ab34710.html</a>                                                                                                                                                         |
| Active Integrin $\beta$ 1 (9EG7) | BD               | 553715     | 1:100 for IF                  | <a href="https://wwwbdbiosciences.com/en-us/products/reagents/flow-cytometry-reagents/research-reagents/single-color-antibodies-ruo/purified-rat-anti-mouse-cd29.553715">https://wwwbdbiosciences.com/en-us/products/reagents/flow-cytometry-reagents/research-reagents/single-color-antibodies-ruo/purified-rat-anti-mouse-cd29.553715</a> |
| Nkx2.5                           | R&D Systems      | AF2444     | 1:100 for IF                  | <a href="https://www.rndsystems.com/products/human-nkx25-antibody_af2444">https://www.rndsystems.com/products/human-nkx25-antibody_af2444</a>                                                                                                                                                                                               |
| FLAG tag                         | Sigma-Aldrich    | F7425      | 1:200 for IP<br>1:2000 for WB | <a href="https://www.sigmaaldrich.com/US/en/product/sigma/f7425">https://www.sigmaaldrich.com/US/en/product/sigma/f7425</a>                                                                                                                                                                                                                 |
| HA tag                           | Santa Cruz       | sc-7392    | 1:40 for IP<br>1:1000 for WB  | <a href="https://www.scbt.com/p/ha-probe-antibody-f-7">https://www.scbt.com/p/ha-probe-antibody-f-7</a>                                                                                                                                                                                                                                     |

DOI [to be added]

|                     |                     |            |                              |                                                                                                                                                                                                                                                                                                                                                                 |
|---------------------|---------------------|------------|------------------------------|-----------------------------------------------------------------------------------------------------------------------------------------------------------------------------------------------------------------------------------------------------------------------------------------------------------------------------------------------------------------|
| V5                  | Abcam               | ab27671    | 1:2000 for WB                | <a href="https://www.abcam.com/products/primary-antibodies/v5-tag-antibody-sv5-pk1-ab27671.html">https://www.abcam.com/products/primary-antibodies/v5-tag-antibody-sv5-pk1-ab27671.html</a>                                                                                                                                                                     |
| FLNC                | Novus Biologicals   | NBP1-89300 | 1:1000 for WB                | <a href="https://www.novusbio.com/products/flnc-antibody_nbp1-89300">https://www.novusbio.com/products/flnc-antibody_nbp1-89300</a>                                                                                                                                                                                                                             |
| GAPDH               | Santa Cruz          | sc-32233   | 1:5000 for WB                | <a href="https://www.scbt.com/p/gapdh-antibody-6c5">https://www.scbt.com/p/gapdh-antibody-6c5</a>                                                                                                                                                                                                                                                               |
| $\beta$ 1D integrin | Thermo Fisher       | MA1-06906  | 1:2000 for WB                | <a href="https://www.thermofisher.com/antibody/product/ITG B1-Antibody-clone-2B1-Monoclonal/MA1-06906">https://www.thermofisher.com/antibody/product/ITG B1-Antibody-clone-2B1-Monoclonal/MA1-06906</a>                                                                                                                                                         |
| Talin1              | Bio-Rad             | MCA4770    | 1:2000 for WB                | <a href="https://www.bio-rad-antibodies.com/monoclonal/human-talin-1-antibody-97h6-mca4770.html?f=purified">https://www.bio-rad-antibodies.com/monoclonal/human-talin-1-antibody-97h6-mca4770.html?f=purified</a>                                                                                                                                               |
| ILK                 | Cell Signaling      | 3862       | 1:2000 for WB                | <a href="https://www.cellsignal.com/products/primary-antibodies/ilk1-antibody/3862">https://www.cellsignal.com/products/primary-antibodies/ilk1-antibody/3862</a>                                                                                                                                                                                               |
| $\gamma$ -SAG       | Vector Laboratories | VP-G803    | 1:1000 for WB                | N/A                                                                                                                                                                                                                                                                                                                                                             |
| Dystrophin          | Abcam               | ab15277    | 1:1000 for WB                | <a href="https://www.abcam.com/products/primary-antibodies/dystrophin-antibody-ab15277.html">https://www.abcam.com/products/primary-antibodies/dystrophin-antibody-ab15277.html</a>                                                                                                                                                                             |
| Xirp2               | Proteintech         | 11896-1-AP | 1:2000 for WB                | <a href="https://www.ptglab.com/products/XIRP2-Antibody-11896-1-AP.htm">https://www.ptglab.com/products/XIRP2-Antibody-11896-1-AP.htm</a>                                                                                                                                                                                                                       |
| JUP                 | Sigma-Aldrich       | P8087      | 1:2000 for WB                | <a href="https://www.sigmaaldrich.com/US/en/product/sigma/p8087">https://www.sigmaaldrich.com/US/en/product/sigma/p8087</a>                                                                                                                                                                                                                                     |
| Normal Rabbit IgG   | Cell Signaling      | 2729       | 1:200 for IP<br>1:500 for IF | <a href="https://www.cellsignal.com/products/primary-antibodies/normal-rabbit-igg/2729?site-search-type=Products&amp;N=102236+4294956287&amp;Ntt=isotype+control&amp;fromPage=plp">https://www.cellsignal.com/products/primary-antibodies/normal-rabbit-igg/2729?site-search-type=Products&amp;N=102236+4294956287&amp;Ntt=isotype+control&amp;fromPage=plp</a> |
| Normal Mouse IgG    | Santa Cruz          | sc-2025    | 1:80 for IP<br>1:500 for IF  | <a href="https://www.scbt.com/p/normal-mouse-igg?requestFrom=search">https://www.scbt.com/p/normal-mouse-igg?requestFrom=search</a>                                                                                                                                                                                                                             |

### DNA/cDNA Clones

| Clone Name                           | Sequence     | Source / Repository                 | Persistent ID / URL                                                                                                                                                                                                                               |
|--------------------------------------|--------------|-------------------------------------|---------------------------------------------------------------------------------------------------------------------------------------------------------------------------------------------------------------------------------------------------|
| pcDNA3-FLNC ABD (WT)-3 x FLAG        | NM_001081185 | Home-made                           |                                                                                                                                                                                                                                                   |
| pcDNA3-FLNC ABD (F93A/L98E)-3 x FLAG | NM_001081185 | Home-made                           |                                                                                                                                                                                                                                                   |
| pcDNA3-ACTC1-HA                      | NM_009608.4  | Home-made                           |                                                                                                                                                                                                                                                   |
| pCMV6-FLNC (WT)-tGFP                 | NM_001081185 | Origene                             | <a href="https://www.origene.com/catalog/cdna-clones/expression-plasmids/mg222854/flnc-nm_001081185-mouse-tagged-orf-clone">https://www.origene.com/catalog/cdna-clones/expression-plasmids/mg222854/flnc-nm_001081185-mouse-tagged-orf-clone</a> |
| pCMV6-FLNC (F93A/L98E)-tGFP          | NM_001081185 | Generated from pCMV6-FLNC (WT)-tGFP |                                                                                                                                                                                                                                                   |
| pCAX-ITGB1-FLAG                      | NM_010578.2  | Addgene                             | <a href="https://www.addgene.org/30153/">https://www.addgene.org/30153/</a>                                                                                                                                                                       |
| pcDNA3- $\gamma$ -SAG-FLAG           | NM_011892.3  | Home-made                           |                                                                                                                                                                                                                                                   |

### Cultured Cells

| Name    | Vendor or Source | Sex (F, M, or unknown) | Persistent ID / URL                                                                         |
|---------|------------------|------------------------|---------------------------------------------------------------------------------------------|
| HEK 293 | ATCC             | unknown                | <a href="https://www.atcc.org/products/crl-1573">https://www.atcc.org/products/crl-1573</a> |

## Other

| Description                                              | Source / Repository    | Persistent ID / URL                                                                                                                                                                                                                                                                                           |
|----------------------------------------------------------|------------------------|---------------------------------------------------------------------------------------------------------------------------------------------------------------------------------------------------------------------------------------------------------------------------------------------------------------|
| Alexa Fluor® 488 AffiniPure Donkey Anti-Rabbit IgG (H+L) | Jackson ImmunoResearch | <a href="https://www.jacksonimmuno.com/catalog/products/711-545-152">https://www.jacksonimmuno.com/catalog/products/711-545-152</a>                                                                                                                                                                           |
| Alexa Fluor® 594 AffiniPure Donkey Anti-Mouse IgG (H+L)  | Jackson ImmunoResearch | <a href="https://www.jacksonimmuno.com/catalog/products/715-585-150">https://www.jacksonimmuno.com/catalog/products/715-585-150</a>                                                                                                                                                                           |
| Alexa Fluor® 488 AffiniPure Donkey Anti-Mouse IgG (H+L)  | Jackson ImmunoResearch | <a href="https://www.jacksonimmuno.com/catalog/products/715-545-150">https://www.jacksonimmuno.com/catalog/products/715-545-150</a>                                                                                                                                                                           |
| Alexa Fluor® 594 AffiniPure Donkey Anti-Rabbit IgG (H+L) | Jackson ImmunoResearch | <a href="https://www.jacksonimmuno.com/catalog/products/711-585-152">https://www.jacksonimmuno.com/catalog/products/711-585-152</a>                                                                                                                                                                           |
| Polyclonal Goat Anti-Rabbit Immunoglobulin/HRP           | Dako                   | <a href="https://www.agilent.com/en/product/specific-proteins/elisa-kits-accessories/goat-anti-rabbit-immunoglobulins-hrp-affinity-isolated-2717113">https://www.agilent.com/en/product/specific-proteins/elisa-kits-accessories/goat-anti-rabbit-immunoglobulins-hrp-affinity-isolated-2717113</a>           |
| Polyclonal Goat Anti-Mouse Immunoglobulin/HRP            | Dako                   | <a href="https://www.agilent.com/en/product/specific-proteins/elisa-kits-accessories/goat-anti-mouse-immunoglobulins-hrp-affinity-isolated-2717109">https://www.agilent.com/en/product/specific-proteins/elisa-kits-accessories/goat-anti-mouse-immunoglobulins-hrp-affinity-isolated-2717109</a>             |
| Tamoxifen                                                | Sigma-Aldrich          | <a href="https://www.sigmaaldrich.com/US/en/product/sigma/t5648">https://www.sigmaaldrich.com/US/en/product/sigma/t5648</a>                                                                                                                                                                                   |
| 4-12% SDS-PAGE gels                                      | Thermo Fisher          | <a href="https://www.thermofisher.com/order/catalog/product/NW04125BOX">https://www.thermofisher.com/order/catalog/product/NW04125BOX</a>                                                                                                                                                                     |
| Immun-Blot PVDF Membrane                                 | Bio-Rad                | <a href="https://www.bio-rad.com/en-us/sku/1620177-immun-blot-pvdf-membrane-roll-26-cm-x-3-3-m?ID=1620177">https://www.bio-rad.com/en-us/sku/1620177-immun-blot-pvdf-membrane-roll-26-cm-x-3-3-m?ID=1620177</a>                                                                                               |
| SuperSignal™ West Femto Maximum Sensitivity Substrate    | Thermo Fisher          | <a href="https://www.thermofisher.com/order/catalog/product/34096">https://www.thermofisher.com/order/catalog/product/34096</a>                                                                                                                                                                               |
| FuGENE HD Transfection Reagent                           | Promega                | <a href="https://www.promega.com/products/luciferase-assays/transfection-reagents/fugene-hd-transfection-reagent/">https://www.promega.com/products/luciferase-assays/transfection-reagents/fugene-hd-transfection-reagent/</a>                                                                               |
| Pierce™ IP Lysis Buffer                                  | Thermo Fisher          | <a href="https://www.thermofisher.com/order/catalog/product/87787">https://www.thermofisher.com/order/catalog/product/87787</a>                                                                                                                                                                               |
| Halt™ Protease & Phosphatase Inhibitor Cocktail          | Thermo Fisher          | <a href="https://www.thermofisher.com/order/catalog/product/78440">https://www.thermofisher.com/order/catalog/product/78440</a>                                                                                                                                                                               |
| Dynabeads™ Protein G                                     | Thermo Fisher          | <a href="https://www.thermofisher.com/order/catalog/product/10003D">https://www.thermofisher.com/order/catalog/product/10003D</a>                                                                                                                                                                             |
| Dulbecco's modified Eagle's medium                       | Thermo Fisher          | <a href="https://www.thermofisher.com/order/catalog/product/11995065">https://www.thermofisher.com/order/catalog/product/11995065</a>                                                                                                                                                                         |
| Medium 199                                               | Thermo Fisher          | <a href="https://www.thermofisher.com/order/catalog/product/11150059">https://www.thermofisher.com/order/catalog/product/11150059</a>                                                                                                                                                                         |
| Horse serum                                              | Thermo Fisher          | <a href="https://www.thermofisher.com/order/catalog/product/26050088">https://www.thermofisher.com/order/catalog/product/26050088</a>                                                                                                                                                                         |
| Fetal bovine serum                                       | Thermo Fisher          | <a href="https://www.thermofisher.com/order/catalog/product/10100147">https://www.thermofisher.com/order/catalog/product/10100147</a>                                                                                                                                                                         |
| Penicillin/Streptomycin                                  | Thermo Fisher          | <a href="https://www.thermofisher.com/order/catalog/product/15140122">https://www.thermofisher.com/order/catalog/product/15140122</a>                                                                                                                                                                         |
| Neonatal Cardiomyocyte Isolation System                  | Worthington            | <a href="https://www.worthington-biochem.com/products/neonatal-cardiomyocyte-isolation-system">https://www.worthington-biochem.com/products/neonatal-cardiomyocyte-isolation-system</a>                                                                                                                       |
| Lipofectamine™ 3000 Transfection Reagent                 | Thermo Fisher          | <a href="https://www.thermofisher.com/order/catalog/product/L3000001">https://www.thermofisher.com/order/catalog/product/L3000001</a>                                                                                                                                                                         |
| TRIzol™ Reagent                                          | Thermo Fisher          | <a href="https://www.thermofisher.com/order/catalog/product/15596026">https://www.thermofisher.com/order/catalog/product/15596026</a>                                                                                                                                                                         |
| RNeasy mini kit                                          | Qiagen                 | <a href="https://www.qiagen.com/us/products/discovery-and-translational-research/dna-rna-purification/rna-purification/total-rna/rneasy-kits?catno=74104">https://www.qiagen.com/us/products/discovery-and-translational-research/dna-rna-purification/rna-purification/total-rna/rneasy-kits?catno=74104</a> |
| M-MLV Reverse Transcriptase                              | Promega                | <a href="https://www.promega.com/products/pcr/rt-pcr/m-mlv-reverse-transcriptase/">https://www.promega.com/products/pcr/rt-pcr/m-mlv-reverse-transcriptase/</a>                                                                                                                                               |

|                                             |                     |                                                                                                                                                                                             |
|---------------------------------------------|---------------------|---------------------------------------------------------------------------------------------------------------------------------------------------------------------------------------------|
| iTaq Universal SYBR Green Supermix          | Bio-Rad             | <a href="https://www.bio-rad.com/en-us/product/itaq-universal-sybr-green-supermix?ID=M87FTF8UU">https://www.bio-rad.com/en-us/product/itaq-universal-sybr-green-supermix?ID=M87FTF8UU</a>   |
| Sirius Red/Fast Green Collagen Staining Kit | Chondrex            | <a href="https://www.chondrex.com/products/sirius-red-fast-green-collagen-staining-kit">https://www.chondrex.com/products/sirius-red-fast-green-collagen-staining-kit</a>                   |
| Antigen Unmasking Solution                  | Vector laboratories | <a href="https://vectorlabs.com/products/histology/antigen-unmasking-solution-citric-acid-based">https://vectorlabs.com/products/histology/antigen-unmasking-solution-citric-acid-based</a> |
| <i>In Situ</i> Cell Death Detection Kit     | Roche               | <a href="https://www.sigmaaldrich.com/US/en/product/roche/11684795910">https://www.sigmaaldrich.com/US/en/product/roche/11684795910</a>                                                     |

## ARRIVE GUIDELINES

The ARRIVE guidelines (<https://arriveguidelines.org/>) are a checklist of recommendations to improve the reporting of research involving animals. Key elements of the study design should be included below to better enable readers to scrutinize the research adequately, evaluate its methodological rigor, and reproduce the methods or findings.

### Study Design

| Groups             | Sex  | Age            | Number (prior to experiment) | Number (after termination) | Littermates (Yes/No) | Other description |
|--------------------|------|----------------|------------------------------|----------------------------|----------------------|-------------------|
| Control            | Male | 8-10 weeks old | 16                           | 16                         | Yes                  |                   |
| <i>Fln</i> c icMut | Male | 8-10 weeks old | 16                           | 3                          | Yes                  |                   |

**Sample Size:** The number of animals in *Fln*c icMut group was determined by the genotypes of the mouse individuals. The number of animals in Control group was chosen to be consistent with that of *Fln*c icMut group.

**Inclusion Criteria:** The study included the male animals with normal body weights, as assessed by the data provided by the vendor ([https://www.criver.com/sites/default/files/resources/doc\\_a/rm\\_rm\\_r\\_male\\_C57BL6NCr\\_mice\\_weight.pdf](https://www.criver.com/sites/default/files/resources/doc_a/rm_rm_r_male_C57BL6NCr_mice_weight.pdf)), prior to the echocardiographic analysis conducted before the administration of Tamoxifen.

**Exclusion Criteria:** Female mice were excluded to ensure the statistical robustness and mitigate the potential interference from the possible side effects of Tamoxifen on female animals (PMID: 17279326, 33850181).

**Randomization:** 8-10 weeks old male mice were assigned randomly to different cages during the weaning process. These assignments remained unchanged throughout the genotyping, echocardiographic analysis and administration of Tamoxifen.

**Blinding:** The performers of the echocardiographic analysis and the administration of Tamoxifen were blinded to the genotypes of the animals included in the study.
